# Supplementary material
Source: PubMed Central journal article supplement (PMC5412959)
Supplement: NIHMS72089-supplement-Supplementary_Information.pdf [file NIHMS72089-supplement-Supplementary_Information.pdf]

## Supplementary Information

### Self-adjusting synthetic gene circuit for correcting insulin resistance

Haifeng Ye<sup>1,2,#\*</sup>, Mingqi Xie<sup>1,#</sup>, Shuai Xue<sup>2</sup>, Ghislaine Charpin-El Hamri<sup>3</sup>, Jianli Yin<sup>2</sup>, Henryk Zulewski<sup>1,4,5</sup> and Martin Fussenegger<sup>1,6\*</sup>

<sup>1</sup>Department of Biosystems Science and Engineering, ETH Zurich, Mattenstrasse 26, CH-4058 Basel, Switzerland.

<sup>2</sup>Shanghai Key Laboratory of Regulatory Biology, Institute of Biomedical Sciences and School of Life Sciences, East China Normal University, Dongchuan Road 500, 200241 Shanghai, China.

<sup>3</sup>Institut Universitaire de Technologie, IUT, Département Génie Biologique, F-69622 Villeurbanne Cedex, France.

<sup>4</sup>Division of Endocrinology, Diabetes and Metabolism, University Hospital Basel, Petersgraben 4, CH-4031 Basel, Switzerland.

<sup>5</sup>Present address: Division of Endocrinology and Diabetes, Stadtspital Triemli, Birmensdorferstrasse 497, CH-8063 Zurich, Switzerland.

<sup>6</sup>University of Basel, Faculty of Science, Mattenstrasse 26, CH-4058 Basel, Switzerland.

<sup>#</sup>These authors contributed equally to this work.

<sup>\*</sup>To whom correspondence should be addressed: M.F. (Tel: +41 61 387 31 60, Fax: +41 61 387 3988, E-mail: fussenegger@bsse.ethz.ch) or H.Y. (Tel: +86 21 5434 1058, Fax: +86 21 5434 2908, E-mail: hfye@bio.ecnu.edu.cn)

| <b>Table of contents</b>                                                               | <b>Page</b> |
|----------------------------------------------------------------------------------------|-------------|
| Western blot analysis of insulin-triggered signalling cascade.....                     | 3           |
| Insulin-triggered SEAP expression in insulin receptor-expressing HEK-293.....          | 4           |
| Validation of the insulin-sensor device in type-1 diabetic mice.....                   | 5           |
| Impact of glucose levels on insulin-triggered SEAP expression <i>in vitro</i> .....    | 6           |
| Insensitivity of the insulin-sensor device to feed-fasting cycles in mice.....         | 7           |
| Induction of the insulin-sensor device by blood-insulin levels.....                    | 8           |
| Self-sufficient insulin-sensor-based expression control in insulin-resistant mice..... | 9           |
| Insulin-triggered adiponectin expression in HEK-293 cells.....                         | 10          |
| Plasmids designed and used in this study.....                                          | 11          |

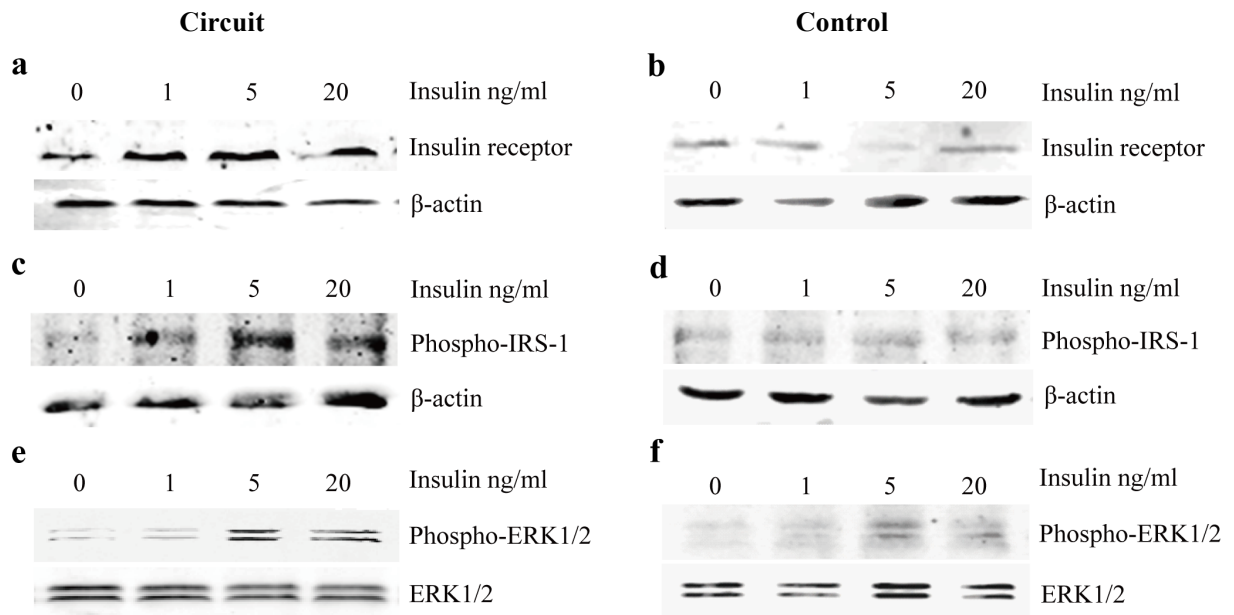

**Supplementary Figure 1 | Western blot analysis of insulin-dependent activation of the IRS-1-Ras-MAPK signalling cascade in HEK-293 cells.** HEK-293 cells co-transfected with the circuit components pIR ( $P_{hCMV}$ -IR-pA), pTetR-ELK1 ( $P_{hCMV}$ -TetR-ELK1-pA) and pMF111 ( $P_{hCMV^{*-1}}$ -SEAP-pA) (**a, c, e; Circuit**) were stimulated with different concentrations of insulin, and the cells were harvested and probed for IR, phospho-IRS-1 and phospho-Erk1/2. HEK-293 cells co-transfected with pKZY73, pTetR-ELK1 and pMF111 (**b, d, f; Control**) were used as a control. Total ERK1/2 and  $\beta$ -actin were used as loading controls.

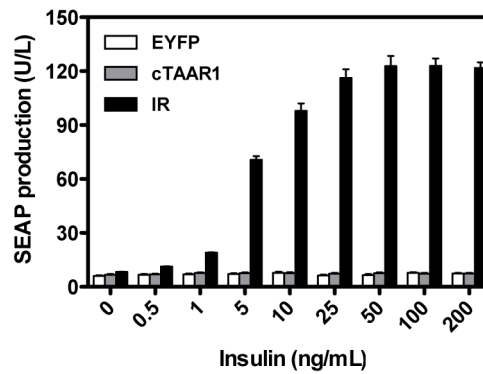

**Supplementary Figure 2 | Insulin-triggered SEAP expression in human insulin receptor (IR)-transfected HEK-293 cells.** HEK-293 cells were co-transfected with pIR ( $P_{hCMV}$ -IR-pA), pTetR-ELK1 ( $P_{hCMV}$ -TetR-ELK1-pA) and pMF111 ( $P_{hCMV^{*-1}}$ -SEAP-pA) at a ratio of 1:1:1 and cultivated for 72 hours in the presence or absence of different concentrations of insulin. Control cells were co-transfected with pEYFP-C1 ( $P_{hCMV}$ -EYFP-pA), pTetR-ELK1 and pMF111 or pKZY73 ( $P_{SV40}$ -cTAAR1-pA), pTetR-ELK1 and pMF111. The data represent the mean  $\pm$  SD; n=3 independent experiments.

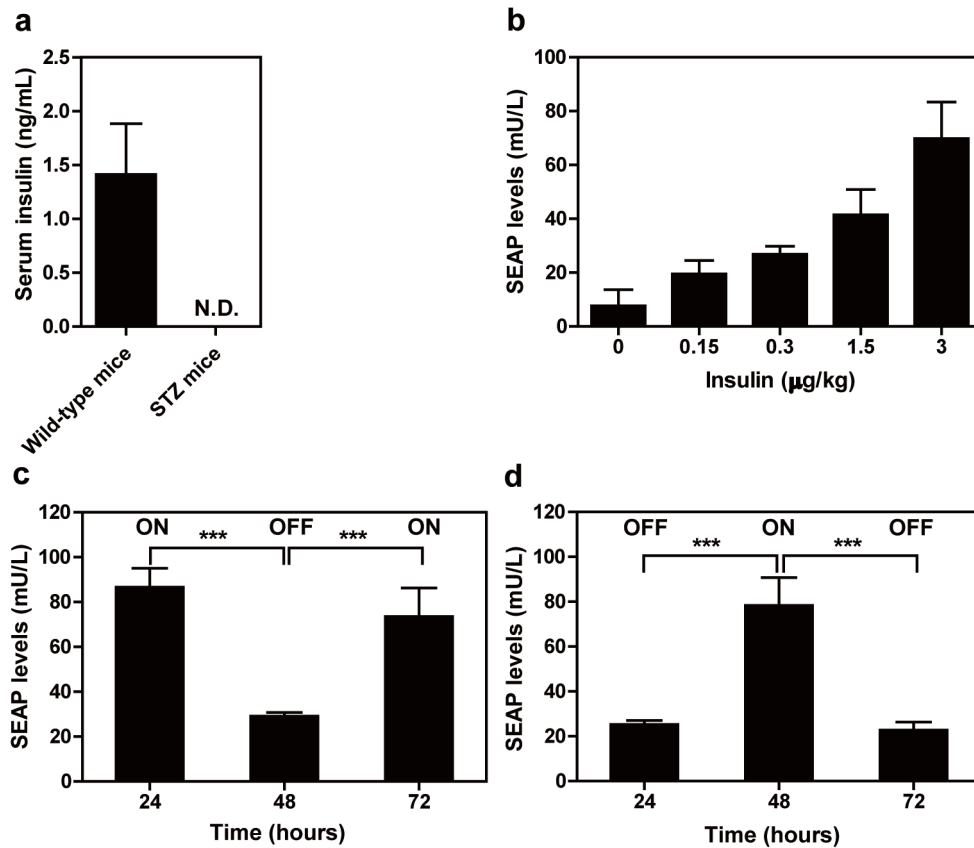

**Supplementary Figure 3 | Adjustability and reversibility of the synthetic insulin-sensor device in an insulin-deficient mouse model.** (a) Insulin ELISA was performed 7 days after STZ injection. (b) Animals were intraperitoneally implanted with  $2 \times 10^6$  encapsulated pIR-/pTetR-ELK1-/pMF111-transgenic HEK-293 cells (200 cells/capsule) and received daily injection of insulin. Serum SEAP levels were profiled of treated animals after 48 h. (c, d) Reversibility of insulin-triggered SEAP expression in mice. Mice implanted with  $2 \times 10^6$  encapsulated pIR-/pTetR-ELK1-/pMF111-transgenic HEK-293 cells were injected with  $3 \mu\text{g/kg}$  insulin at 0 and 48 h (ON-OFF-ON) or only at 24 h (OFF-ON-OFF) after implantation. SEAP levels in the serum were profiled of treated animals after 24, 48, and 72h. The data represent the mean  $\pm$  SEM, statistical analysis using a two-tailed Student's *t*-test,  $n=6$  mice per group. \* $P < 0.05$ , \*\* $P < 0.01$ , \*\*\* $P < 0.001$  vs. control. N.D., not detectable (Detection limit:  $\leq 0.2$  ng/mL).

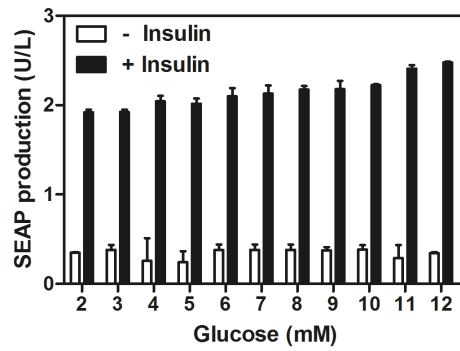

**Supplementary Figure 4 | The impact of glucose levels on insulin-triggered SEAP expression *in vitro*.** HEK-293 cells were co-transfected with pIR, pTetR-ELK1 and pMF111 at a ratio of 1:1:1 and cultivated for 48 hours in the presence of different concentrations of glucose and in the presence or absence of human insulin (1 ng/mL) before SEAP levels were profiled in the culture supernatant. The data represent the mean  $\pm$  SD; n=3 independent experiments.

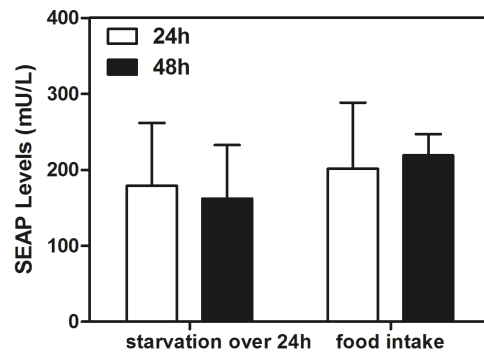

**Supplementary Figure 5 | Insensitivity of the insulin-sensor circuit to feed-fasting cycles**

**mice.** Wild-type mice were intraperitoneally implanted with  $2 \times 10^6$  encapsulated pIR-/pTetR-ELK1-/pMF111-transgenic HEK-293 cells (200 cells/capsule) and either subjected to an initial starvation phase of 24 hours (average glycaemia of starved mice prior to food exposure:  $4.9 \pm 0.6$  mM) or normal access to food over 48 hours (average glycaemia of non-fasted mice:  $9.5 \pm 0.9$  mM). SEAP levels in the animals' sera were quantified at 24 and 48 hours after implantation. The data represent the mean  $\pm$  SEM, n=8 mice per group.

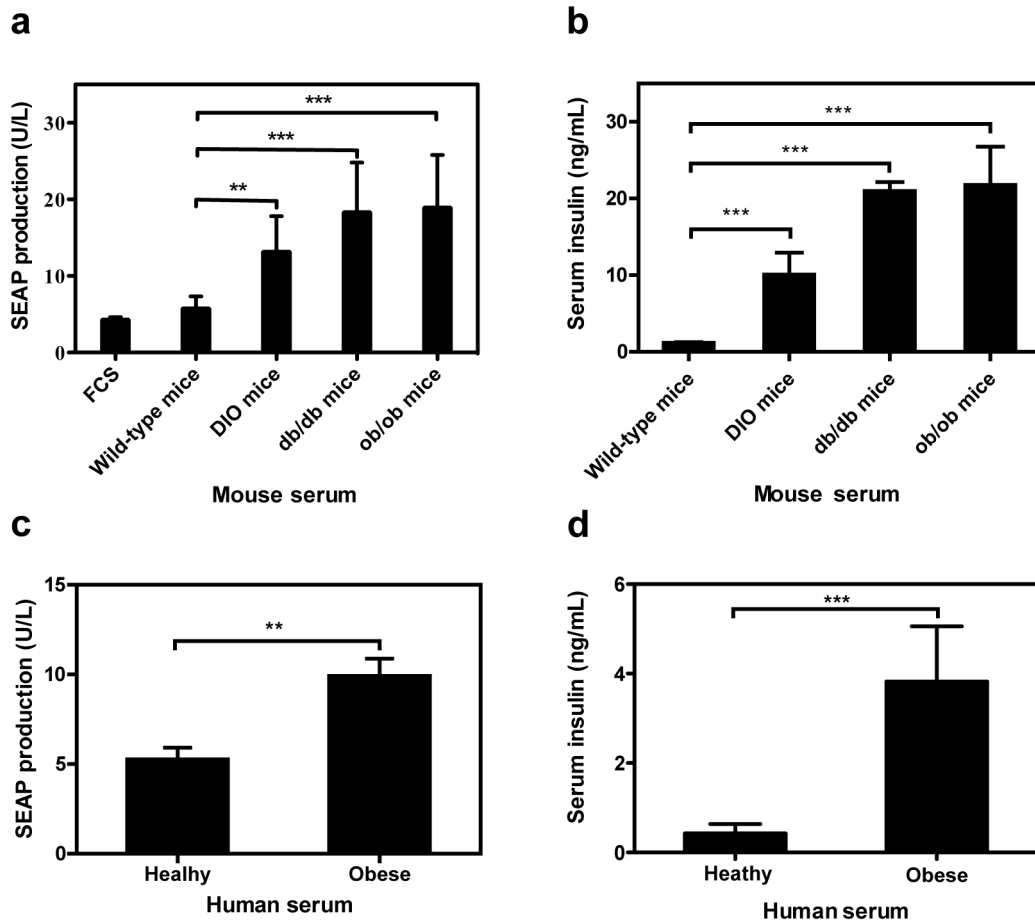

**Supplementary Figure 6 | Serum containing high levels of insulin triggered transgene expression in HEK-293 cells.** (a, c) Cell-based assay. Insulin-triggered SEAP expression of pIR-/pTetR-ELK1-/pMF111-co-transfected HEK-293 cells cultivated for 72 hours in the presence of (a) 10% mouse serum or (c) 10% human serum. (b, d) ELISA of undiluted serum used in (a) and (c). Corresponding insulin levels in the (b) mouse and (d) human sera were quantified by an insulin-specific ELISA. The data represent the mean  $\pm$  SD, statistical analysis by a two-tailed Student's *t*-test,  $n=8$ ,  $**P<0.01$ ,  $***P<0.001$  vs. control.



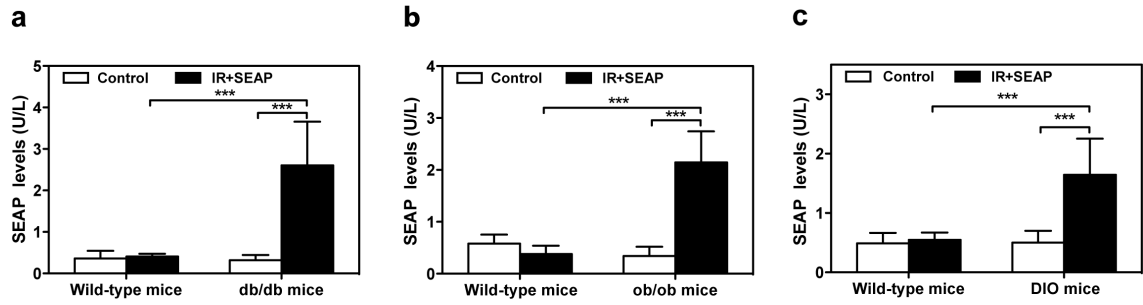

**Supplementary Figure 7 | Self-sufficient insulin-sensor-based control of SEAP expression in insulin-resistant (a) db/db, (b) ob/ob and (c) DIO mouse models.** Mice were intraperitoneally implanted with  $2 \times 10^6$  encapsulated pIR-/pTetR-ELK1-/pMF111-transgenic HEK-293 cells (200 cells/capsule). Control mice were intraperitoneally implanted with  $2 \times 10^6$  encapsulated pKZY73-/pTetR-ELK1-/pMF111-transgenic HEK-293 cells (200 cells/capsule). After 48 hours of implantation, SEAP levels in the serum were profiled. The data represent the mean  $\pm$  SEM, statistical analysis by a two-tailed Student's *t*-test,  $n=8$  mice per group. \*\*\* $P < 0.001$  vs. control.

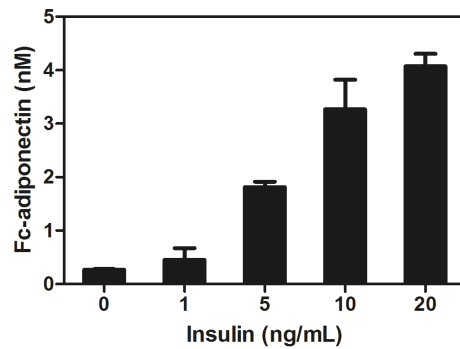

**Supplementary Figure 8 | Insulin-triggered adiponectin expression in HEK-293 cells.**

The adiponectin expression kinetics of HEK-293 cells co-transfected with pIR, pTetR-ELK1, and pHY79 ( $P_{hCMV^{*}-1}$ -Fc-adiponectin-pA) at a ratio of 1:1:1 and cultivated for 72 h in the presence or absence of different concentrations of human insulin. The Fc-adiponectin expression levels in the culture medium were quantified using a human IgG1-specific ELISA kit. The data represent the mean  $\pm$  SD; n=3 independent experiments.

**Table S1.** Plasmids designed and used in this study.

| Plasmid        | Description                                                                                                                                                                                                                                                                                                                                                                                                                                                                                                                                                                                                                                                                                                                                                                                                                                                            | Reference      |
|----------------|------------------------------------------------------------------------------------------------------------------------------------------------------------------------------------------------------------------------------------------------------------------------------------------------------------------------------------------------------------------------------------------------------------------------------------------------------------------------------------------------------------------------------------------------------------------------------------------------------------------------------------------------------------------------------------------------------------------------------------------------------------------------------------------------------------------------------------------------------------------------|----------------|
| pcDNA3.1(+)    | Mammalian expression vector (P <sub>hCMV</sub> -MCS-pA).                                                                                                                                                                                                                                                                                                                                                                                                                                                                                                                                                                                                                                                                                                                                                                                                               | Invitrogen, CA |
| pEYFP-C1       | Constitutive EYFP expression vector (P <sub>hCMV</sub> -EYFP-pA).                                                                                                                                                                                                                                                                                                                                                                                                                                                                                                                                                                                                                                                                                                                                                                                                      | Clontech, CA   |
| pSEAP2-Control | Constitutive SEAP expression vector (P <sub>SV40</sub> -SEAP-pA).                                                                                                                                                                                                                                                                                                                                                                                                                                                                                                                                                                                                                                                                                                                                                                                                      | Clontech, CA   |
| pIR            | Constitutive human IR expression vector (P <sub>hCMV</sub> -IR-pA) (Addgene no. 24049).                                                                                                                                                                                                                                                                                                                                                                                                                                                                                                                                                                                                                                                                                                                                                                                | (19)           |
| pCMV-T7-SB100  | Constitutive SB100X expression vector (P <sub>hCMV</sub> -SB100X-pA) (Addgene no. 34879).                                                                                                                                                                                                                                                                                                                                                                                                                                                                                                                                                                                                                                                                                                                                                                              | (38)           |
| pSBtet-GP      | SB100X-specific transposon containing a tetracycline-responsive luciferase expression unit and a constitutive expression unit for EGFP, rtTA and PuroR.<br>(P <sub>hCMV</sub> *-1-Luc-pA:P <sub>RPBSA</sub> -EGFP-P2A-rtTA-P2A-PuroR-pA) (Addgene no. 60495).                                                                                                                                                                                                                                                                                                                                                                                                                                                                                                                                                                                                          | (43)           |
| pH107          | Lentiviral vector containing constitutive expression units for EGFP-3FLAG and ZeoR (LTR-P <sub>hCMV</sub> -EGFP-3FLAG-pA:P <sub>mPGK</sub> -ZeoR-pA-LTR).                                                                                                                                                                                                                                                                                                                                                                                                                                                                                                                                                                                                                                                                                                              | ObiO, Shanghai |
| pTetR-ELK1     | Constitutive TetR-ELK1 expression vector (P <sub>hCMV</sub> -TetR-ELK1-pA).                                                                                                                                                                                                                                                                                                                                                                                                                                                                                                                                                                                                                                                                                                                                                                                            | (44)           |
| pMF111         | Tetracycline-responsive SEAP expression vector (P <sub>hCMV</sub> *-1-SEAP-pA).                                                                                                                                                                                                                                                                                                                                                                                                                                                                                                                                                                                                                                                                                                                                                                                        | (33)           |
| pKZY73         | Constitutive cTAAR1 expression vector (P <sub>SV40</sub> -cTAAR1-pA).                                                                                                                                                                                                                                                                                                                                                                                                                                                                                                                                                                                                                                                                                                                                                                                                  | (16)           |
| pXS39          | Mammalian expression vector containing constitutive expression units for SEAP and ZeoR (P <sub>hCMV</sub> -SEAP-pA:P <sub>mPGK</sub> -ZeoR-pA).<br>A linearized vector (Fragment 1) was PCR-amplified from pcDNA3.1(+) using OXS79 (5'- <u>GTTTAAACCCGCTGATCAGCCTCG</u> -3') and OXS80 (5'- <u>CTAGCCAGCTTGGGTCTCCCTATAG-3'</u> ), SEAP-pA (Fragment 2) was PCR-amplified from pSEAP2-Control using OXS81 (5'- <u>AGGGAGACCCAAGCTGGCTAGGCCACCATGCTGCTGCTGCTGC</u> -3') and OXS82 (5'- <u>AGCGCCTCCCTACCCGGTAGGCTCCATCGTTCAGATCCTTATCG</u> -3'), P <sub>mPGK</sub> -ZeoR (Fragment 3) was PCR-amplified from pH107 using OXS83 (5'- <u>CTACCGGGTAGGGGAGGCGCTTTTC</u> -3') and OXS84 (5'- <u>GGCTGATCAGCGGGTTTAAACCCGCTCAGTCCTGCTCCTCGGCCAC</u> -3'), and all fragments were assembled by homologous recombination using the GeneArt® Seamless Cloning and Assembly Kit. | This work      |

|        |                                                                                                                                                                                                                                                                                                                                                                                                                                                                                                                                                                                                                                                                                                                                                                     |           |
|--------|---------------------------------------------------------------------------------------------------------------------------------------------------------------------------------------------------------------------------------------------------------------------------------------------------------------------------------------------------------------------------------------------------------------------------------------------------------------------------------------------------------------------------------------------------------------------------------------------------------------------------------------------------------------------------------------------------------------------------------------------------------------------|-----------|
| pHY74  | <p>Tetracycline-responsive EYFP expression vector (<math>P_{hCMV^*1}</math>-EYFP-pA).<br/> EYFP was PCR-amplified from pEYFP-C1 using OHY163 (5'-<u>gcgccgacgaattcGCCACCATGGTGAGCAAGGGCGAGGAGCTGTTCACC</u>-3') and OHY164 (5'-<u>cacgcacgaagcttTACTTGTACAGCTCGTCCATGCC</u>-3'), restricted with <i>EcoRI/HindIII</i> and cloned into the corresponding sites of pMF111.</p>                                                                                                                                                                                                                                                                                                                                                                                         | This work |
| pHY79  | <p>Tetracycline-responsive Fc-adiponectin expression vector (<math>P_{hCMV^*1}</math>-Fc-adiponectin-pA).<br/> Custom-designed Fc-adiponectin<sup>7</sup> was restricted with <i>EcoRI/HindIII</i> and cloned into the corresponding sites of pMF111.</p>                                                                                                                                                                                                                                                                                                                                                                                                                                                                                                           | This work |
| pHY112 | <p>Mammalian expression vector containing a constitutive bicistronic expression unit for SEAP and EGFP (<math>P_{SV40}</math>-SEAP-P2A-EGFP-pA).<br/> A linearized vector (Fragment 1) was PCR-amplified from pSEAP2-Control using OHY205 (5'-<u>CTCGGCATGGACGAGCTGTACAAGGGAGAATGGGCGGA</u>ACTGGGCGGAG-3') and OHY206 (5'-<u>GGCTGAAGTTAGTAGCTCCGCTTCCTGTCTGCTCGAAGCGGCCGCGCCG</u>-3'), P2A-EGFP (Fragment 2) was PCR-amplified from pSBtet-GP using OHY207 (5'-<u>GGAAGCGGAGCTACTA</u>ACTTCAGCCTGCTGAAGCAGGCTGGAGACGTGGAGGAGAACCCTGGACCTTCCGGA GTGAGCAAGGGCGAGGAGCTGTTC-3') and OHY208 (5'-<u>CTTGTACAGCTCGTCCATGCCGAG</u>-3'), and both fragments were assembled by homologous recombination using the GeneArt<sup>®</sup> Seamless Cloning and Assembly Kit.</p> | This work |
| pHY113 | <p>SB100X-specific transposon containing a constitutive bicistronic expression IR and PuroR unit (ITR-<math>P_{hCMV}</math>-IR-P2A-PuroR-pA-ITR).<br/> A linearized vector (Fragment 1) was PCR-amplified from pSBtet-GP using OHY209 (5'-<u>GGGTCCGGCGCTACTA</u>ACTTCAGCC-3') and OHY210 (5'-<u>CTAGATAGCGGACCCCTTACCGAAAC</u>-3'), <math>P_{hCMV}</math>-IR (Fragment 2) was PCR-amplified from pIR using OHY211 (5'-<u>CGGTAAGGGTCCGCTATCTAGGCGCTGCTTCGCGATGTAC</u> GGGCCAG-3') and OHY212 (5'-<u>GAAGTTAGTAGCGCCGACCCGGAAGGATTGGACCGAGGCAAGGTCAG</u>-3'), and both fragments were assembled by homologous recombination using the GeneArt<sup>®</sup> Seamless Cloning and Assembly Kit.</p>                                                                    | This work |

|        |                                                                                                                                                                                                                                                                                                                                                                                                                                                                                                                                                                                                                                                                                                                                                                                                                                      |           |
|--------|--------------------------------------------------------------------------------------------------------------------------------------------------------------------------------------------------------------------------------------------------------------------------------------------------------------------------------------------------------------------------------------------------------------------------------------------------------------------------------------------------------------------------------------------------------------------------------------------------------------------------------------------------------------------------------------------------------------------------------------------------------------------------------------------------------------------------------------|-----------|
| pHY115 | <p>Tetracycline-responsive bicistronic Fc-adiponectin and EGFP expression vector (P<sub>hCMV*-1</sub>-Fc-adiponectin-P2A-EGFP-pA).</p> <p>Fc-adiponectin (Fragment 1) was PCR-amplified from pHY79 using OHY213 (5'-<u>CTACCATGACACC AACactagtCCTGGAGAAGGTGCCTATGTATAC</u>-3') and OHY214 (5'-<u>GTTAGTAGCTCCGCTTCCG TTGGTGTTCATGGTAGAGAAGAAAG</u>-3') and P2A-EGFP (Fragment 2) was PCR-amplified from pHY112 using OHY215 (5'-<u>CTCTACCATGACACCAACGGAAGCGGAGCTACTAACTTCAGC</u>-3') and OHY216 (5'-<u>CATGTCTGGATCGAAgctagcTTACTTGTACAGCTCGTCCATGCCG</u>-3'). Both fragments were assembled by homologous recombination using the GeneArt<sup>®</sup> Seamless Cloning and Assembly Kit and cloned into pHY79 (<i>SpeI/NheI</i>).</p>                                                                                              | This work |
| pHY117 | <p>SB100X derivative containing a constitutive PuroR expression unit (ITR -P<sub>mPGK</sub>-PuroR-pA-ITR).</p> <p>A linearized vector (Fragment 1) was PCR-amplified from pSBtet-GP using OHY217 (5'-<u>ATGACCGA GTACAAGCCCACGGTGC</u>-3') and OHY218 (5'-<u>CTAGATAGCGGACCCCTTACCGAAAC</u>-3'), P<sub>mPGK</sub> (Fragment 2) was PCR-amplified from pH107 using OHY219 (5'-<u>GGTAAGGGGTCCGCTATCT AGCCGGGTAGGGGAGGCGCTTTTCCC</u>-3') and OHY220 (5'-<u>CGTGGGCTTGTA CTCCGTCATG GTAAGCTTGGGCTGCAGGTCGAAAG</u>-3'), and both fragments were assembled by homologous recombination using the GeneArt<sup>®</sup> Seamless Cloning and Assembly Kit.</p>                                                                                                                                                                               | This work |
| pHY118 | <p>SB100X derivative containing a tetracycline-responsive bicistronic Fc-adiponectin and EGFP expression unit and a constitutive PuroR expression unit. (ITR-P<sub>hCMV*-1</sub>-Fc-adiponectin-P2A-EGFP-pA: P<sub>mPGK</sub>-PuroR-pA-ITR).</p> <p>A linearized vector (Fragment 1) was PCR-amplified from pHY117 using OHY221 (5'-<u>CCGGGTAGG GGAGGCGCTTTTCCC</u>-3') and OHY222 (5'-<u>CTAGATAGCGGACCCCTTACCGAAAC</u>-3'), P<sub>hCMV*-1</sub>-Fc-adiponectin-P2A-EGFP-pA (Fragment 2) was PCR-amplified from pHY115 using oligonucleotides OHY223 (5'-<u>GGTAAGGGGTCCGCTATCTAGGTGCCACCTGACGTCTAAGAAA CC</u>-3') and OHY224 (5'-<u>GAAAAGCGCCTCCCCTACCCGGG CAGGATCATAATCAGCCATACCA C</u>-3'), and both fragments were assembled by homologous recombination using the GeneArt<sup>®</sup> Seamless Cloning and Assembly Kit.</p> | This work |

|        |                                                                                                                                                                                                                                                                                                                                                                                                                                                                                                                                                                                                                                                                                                                                                                                                                                                                                                                                                           |           |
|--------|-----------------------------------------------------------------------------------------------------------------------------------------------------------------------------------------------------------------------------------------------------------------------------------------------------------------------------------------------------------------------------------------------------------------------------------------------------------------------------------------------------------------------------------------------------------------------------------------------------------------------------------------------------------------------------------------------------------------------------------------------------------------------------------------------------------------------------------------------------------------------------------------------------------------------------------------------------------|-----------|
| pHY121 | <p>SB100X derivative containing a constitutive bicistronic IR and TetR-Elk1 expression unit and a constitutive ZeoR expression unit (ITR-P<sub>hCMV</sub>-IR-P2A-TetR-Elk1-pA:P<sub>mPGK</sub>-ZeoR-pA-ITR). A linearized vector (Fragment 1) was PCR-amplified from pHY113 using OHY231 (5'-<u>TTCGAAGGCCTGTCGTGAAGCTTGG</u>-3') and OHY232 (5'-<u>GGGACCAGGATTCTCCTCGACGTC</u>-3'), TetR-Elk1 (Fragment 2) was PCR-amplified from pTetR-ELK1 using OHY233 (5'-<u>GTCGAGGAGAATCCTGGTCCCATGTCTAGACTGGACAAGAGCAAAG</u>-3') and OHY234 (5'-<u>GTCTGGATCGAAGCTTAGTTACCCGGGACCGGTTTCATGGC</u>-3'), pA-P<sub>mPGK</sub>-ZeoR (Fragment 3) was PCR-amplified from pXS39 using OHY235 (5'-<u>GAACCGGTCCCGGGTAACTAAGCTTCGATCCAGACATGATAAGATAC</u>-3') and OHY236 (5'-<u>GCTTCACGACAGGCCTTCGAATCAGTCCTGCTCCTCGGCCACGAAG</u>-3'), and all fragments were assembled by homologous recombination using the GeneArt<sup>®</sup> Seamless Cloning and Assembly Kit.</p> | This work |
|--------|-----------------------------------------------------------------------------------------------------------------------------------------------------------------------------------------------------------------------------------------------------------------------------------------------------------------------------------------------------------------------------------------------------------------------------------------------------------------------------------------------------------------------------------------------------------------------------------------------------------------------------------------------------------------------------------------------------------------------------------------------------------------------------------------------------------------------------------------------------------------------------------------------------------------------------------------------------------|-----------|

**Oligonucleotides:** Restriction endonuclease-specific sites are underlined in lowercase letters, annealing base pairs are indicated in capital letters, the homologous recombination sequences are underlined in capital letters.

**Abbreviations:** **3FLAG**, a polypeptide epitope containing three DYKDDDDK<sup>45</sup> repeats; **cTAAR1**, chimeric trace-amine-associated receptor 1; **EGFP**, enhanced green fluorescent protein; **ELK1**, human ETS domain-containing transcription factor Elk1; **EYFP**, enhanced yellow fluorescent protein; **Fc-adiponectin**, synthetic secretion-engineered adiponectin<sup>23</sup> containing a 5' Kozak sequence, an interleukin-2 secretion signal and the Fc sequence of human IgG1 fused N'-terminally to three human globular adiponectin modules; **ITR**, inverted terminal repeats of SB100X; **IR**, insulin receptor; **Luc**, firefly luciferase; **LTR**, lentiviral long terminal repeat; **MCS**, multiple cloning site; **pA**, polyadenylation signal; **PCR**, polymerase chain reaction; **P<sub>hCMV</sub>**, human cytomegalovirus immediate early promoter; **P<sub>hCMVmin</sub>**, minimal version of P<sub>hCMV</sub>; **P<sub>hCMV\*-1</sub>**, tetracycline-responsive promoter (tetO<sub>7</sub>-P<sub>hCMVmin</sub>); **P<sub>mPGK</sub>**, mouse phosphoglycerate kinase gene promoter; **P<sub>RPBSA</sub>**, synthetic constitutive promoter<sup>3</sup>; **P<sub>SV40</sub>**, simian virus 40 promoter; **P2A**, picornavirus-derived self-cleaving peptide engineered for bicistronic gene

expression in mammalian cells; **PuroR**, gene conferring puromycin resistance; **rtTA**, reverse tetracycline-dependent transactivator; **SEAP**, human placental secreted alkaline phosphatase; **SB100X**, Sleeping Beauty transposase; **TetR**, *Escherichia coli* Tn10-derived tetracycline-dependent repressor of the tetracycline resistance gene; **tetO<sub>7</sub>**, TetR-specific heptameric operator sequence; **ZeoR**, gene conferring zeocin resistance.

### References:

- 16 Ye, H. et al. Pharmaceutically controlled designer circuit for the treatment of the metabolic syndrome. *Proceedings of the National Academy of Sciences of the United States of America* **110**, 141-146 (2013).
- 19 Jacob, K. K., Whittaker, J. & Stanley, F. M. Insulin receptor tyrosine kinase activity and phosphorylation of tyrosines 1162 and 1163 are required for insulin-increased prolactin gene expression. *Molecular and Cellular Endocrinology* **186**, 7-16 (2002).
- 23 Ge, H. et al. Generation of novel long-acting globular adiponectin molecules. *Journal of Molecular Biology* **399**, 113-119 (2010).
- 33 Fussenegger, M. et al. Streptogramin-based gene regulation systems for mammalian cells. *Nature Biotechnology* **18**, 1203-1208 (2000).
- 38 Mates, L. et al. Molecular evolution of a novel hyperactive Sleeping Beauty transposase enables robust stable gene transfer in vertebrates. *Nature Genetics* **41**, 753-761 (2009).
- 43 Kowarz, E., Loscher, D. & Marschalek, R. Optimized Sleeping Beauty transposons rapidly generate stable transgenic cell lines. *Biotechnology Journal* **10**, 647-653 (2015).
- 44 Keeley, M.B., Busch, J., Singh, R. & Abel, T. TetR hybrid transcription factors report cell signalling and are inhibited by doxycycline. *BioTechniques* **39**, 529-536 (2005).
- 45 Noguchi, C., Garabedian, M. V., Malik, M. & Noguchi, E. A vector system for genomic FLAG epitope-tagging in *Schizosaccharomyces pombe*. *Biotechnology Journal* **3**, 1280-1285 (2008).
